# Supplementary material for: Two Arabidopsis Splicing Factors, U2AF65a and U2AF65b, Differentially Control Flowering Time by Modulating the Expression or Alternative Splicing of a Subset of FLC Upstream Regulators
Source: MDPI journal article supplement (doi:10.3390/plants12081655), 2023-04-14
Supplement: s1 [file s1]

*Supplemental file*

# **Two *Arabidopsis* Splicing Factors, U2AF65a and U2AF65b, Differentially Control Flowering Time by Modulating the Expression or Alternative Splicing of a Subset of *FLC* Upstream Regulators**

Hee Tae Lee <sup>1</sup>, Hyo-Young Park <sup>1</sup>, Keh Chien Lee <sup>1</sup>, Jeong Hwan Lee <sup>2</sup> and Jeong-Kook Kim <sup>1,\*</sup>

<sup>1</sup> Division of Life Sciences, Korea University, 145 Anam-ro, Seongbuk-gu, Seoul 02841, Republic of Korea

<sup>2</sup> Division of Life Sciences, Jeonbuk National University, 567 Baekje-daero, Deokjin-gu, Jeonju, Jeollabuk-do 54896, Republic of Korea

\* Correspondence: jkkim@korea.ac.kr

Received: 7 March 2023; Accepted: 11 April 2023; Published: 14 April 2023

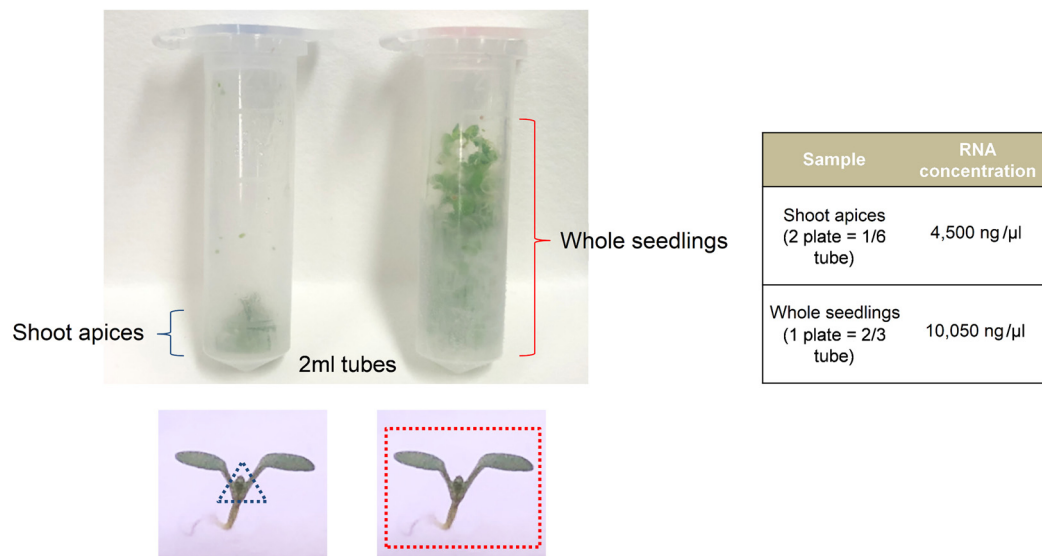

**Figure S1.** Shoot apex regions and whole seedling parts of *Arabidopsis* seedlings used for RNA-seq analysis. The photographs show the shoot apex regions prepared from 7-d-old seedlings by leaf and stem-root cuttings and 7-d-old whole seedlings.

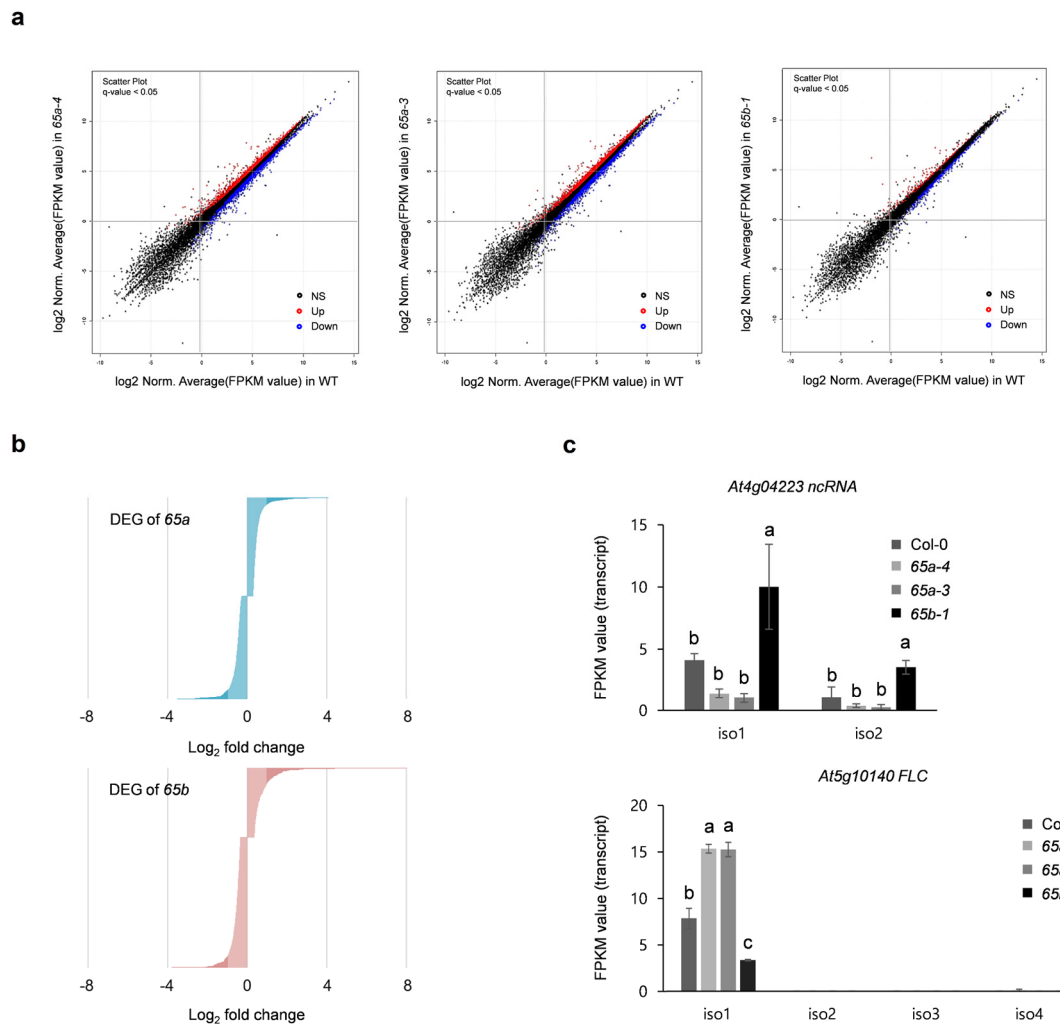

**Figure S2.** Differentially expressed genes (DEGs) regulated by AtU2AF65a and AtU2AF65b. RNA-seq analysis using shoot apices' RNAs of wild-type (WT, Col-0), *atu2af65a-4*, *atu2af65a-3* and *atu2af65b-1* plants. **(a)** Scatter plots demonstrating DEGs between WT and *atu2af65*-plants. The values of x- and y-axis represent the normalized signal values of WT and mutant samples, respectively. Up, up-regulated; Down, down-regulated; ns, not significant **(b)** DEGs with fold change (FC) in two mutants  $q\text{-value} \leq 0.05$  as the threshold. The DEGs with  $|\log_2 \text{FC}| \geq 1$  indicate colored dark. **(c)** Transcript levels of *ncRNA* and *FLC* genes with  $|\log_2 \text{FC}| \geq 1$  based on FPKM values between WT and three *atu2af65* plants. FPKM values of different isoforms for each gene are presented. The letters indicate statistically significant differences ( $P < 0.05$ ) based on Duncan method.

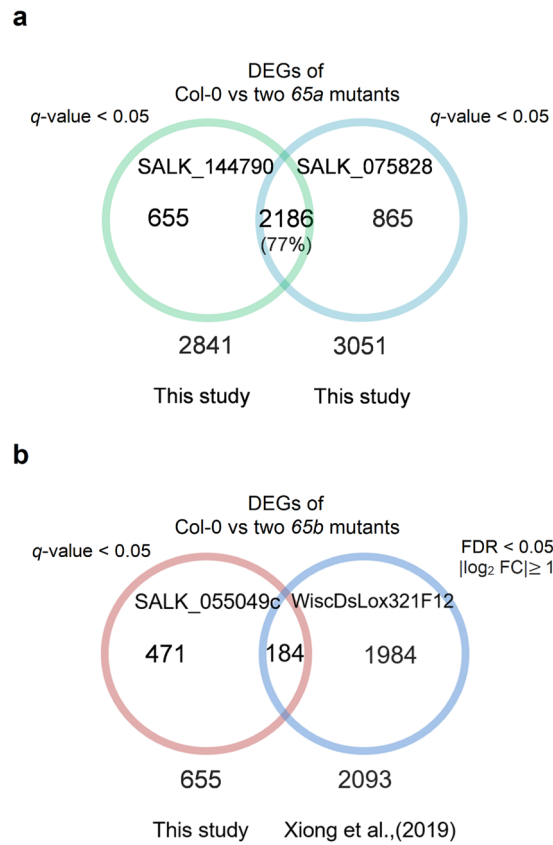

**Figure S3.** Comparisons of differentially expressed genes regulated by two different mutant alleles of *AtU2AF65a* or *AtU2AF65b*. Venn diagrams showing the numbers of DEGs (**a**) in two different *atu2af65a* mutants (SALK\_144790 and SALK\_075828) and DEGs (**b**) in two different *atu2af65b* mutants (SALK\_055049c and WiscDsLox321F12). Total DEGs of *atu2af65b* (WiscDsLox321F12) were from RNA-seq data using 10-d-old shoot apices of Xiong et al., [20].

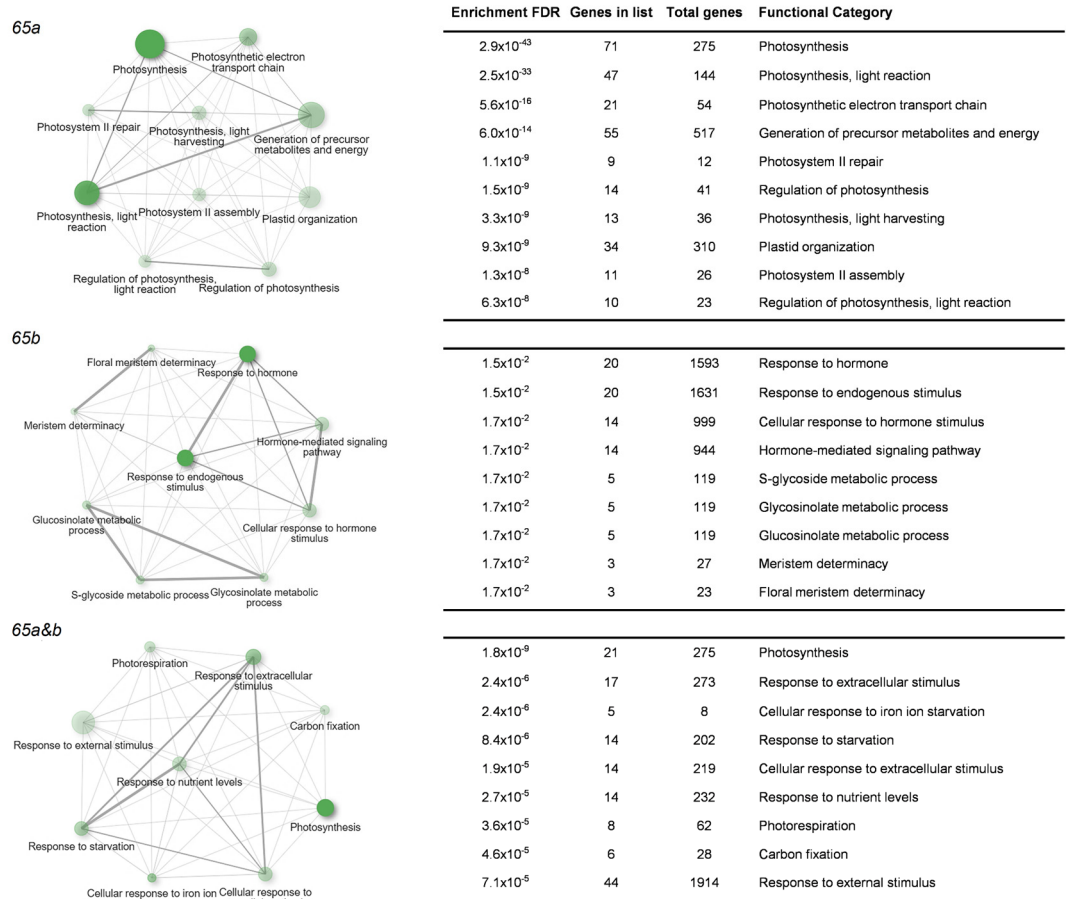

**Figure S4.** Gene ontology (GO) enrichment analysis in *atu2af65a* and *atu2af65b* mutants. Total DEGs used in Figure 1b were applied to this GO enrichment analysis. *65a*, DEGs of *atu2af65a* mutants only; *65b*, DEGs of *atu2af65b* mutants only; *65a&b*, overlapped DEGs of *atu2af65a* and *atu2af65b* mutants.

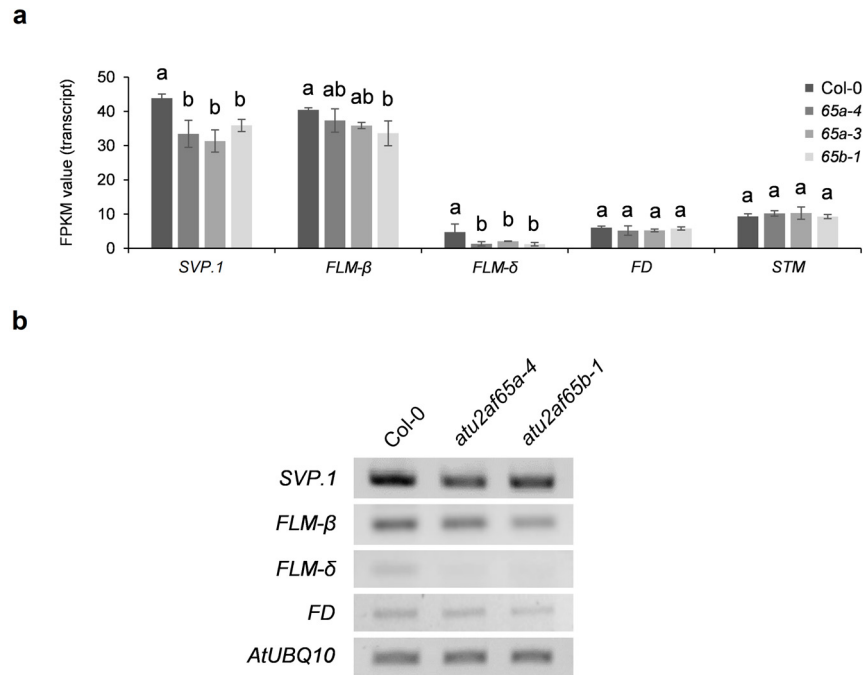

**Figure S5.** Expression patterns of flowering time genes in shoot apex regions of wild-type (Col-0) and two mutant plants. **(a)** Transcript levels of *SVP.1* (*At2g22540.1*), *FLM-β* (*At1g77080.4*), *FLM-δ* (*At1g77080.2*), and *FD* (*At4g35900.1*) based on FPKM values. *STM* (*At1g62360*) gene was used as a shoot apex specific control. The letters indicate statistically significant differences ( $P < 0.05$ ) based on Duncan method. **(b)** Expression of *SVP.1*, *FLM-β*, *FLM-δ*, and *FD* in shoot apices of wild type (Col-0), *atu2af65a-4* and *atu2af65b-1* plants. *AtUBQ10* (*At4g05320*) gene was used as an internal control. It was measured by semi-quantitative RT-PCR analysis.

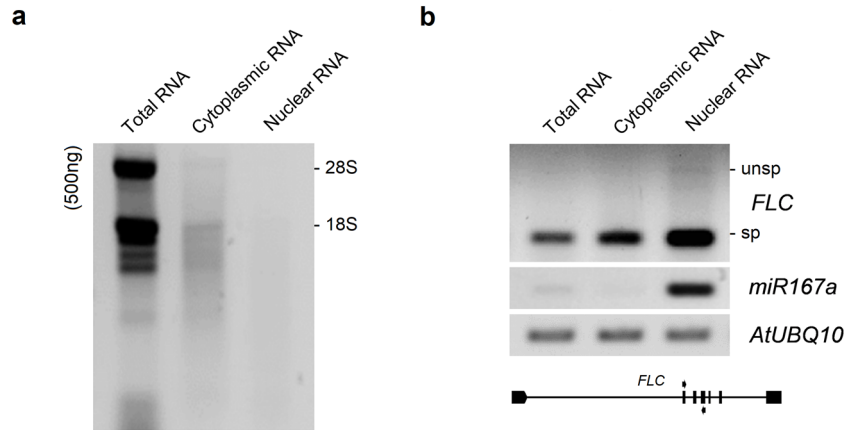

**Figure S6.** Quality control of nuclear RNA fraction. (a) Gel visualization of RNAs of different fractions generated during nuclear RNA purification process. 28S and 18S rRNA bands were much less enriched at nuclear RNA than cytoplasmic RNA in 7-d-old whole seedlings. (b) Identification of unspliced *FLC* forms in nuclear RNA fraction. Unspliced *FLC* forms were mostly enriched in nuclear RNA fraction. The primer used for RT-PCR analysis indicated black arrows in *FLC* gene structure. *miR167a* (*At3g22886*) and *AtUBQ10* (*At4g05320*) gene were used as a positive control for nuclear RNA enrichment and an internal control for RT-PCR analysis, respectively.

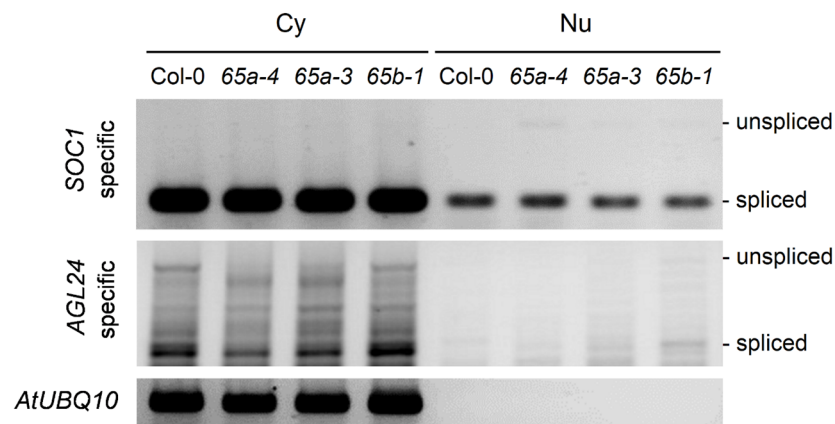

**Figure S7.** Detection of unspliced and spliced *SOC1* and *AGL24* forms in shoot apices' nuclear fractions of 7-d-old wild-type (Col-0), *atu2af65a-4*, *atu2af65a-3*, and *atu2af65b-1* plants. Cy, cytoplasmic RNA; Nu, nuclear RNA. Note that unspliced RNA was mostly enriched in nuclear RNA fraction, but *SOC1* and *AGL24* splicing defects were not identified in nuclear RNA fraction of *atu2af65a-4* and *atu2af65a-3* mutants.



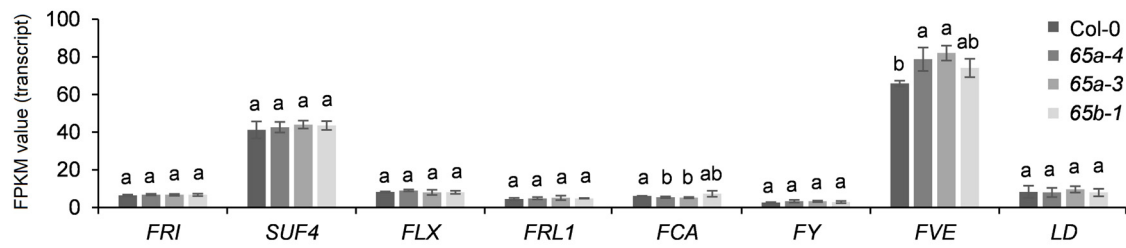

**Figure S8.** Expression patterns of FRI complex and autonomous genes in shoot apex regions of wild-type (Col-0) and two mutant plants. Transcript levels of *FRI* (*At4g00650.1*), *SUF4* (*At1g30970.1*), *FLX* (*At2g30120.1*), *FRL1* (*At5g16320.1*), *FCA* (*At4g16280.2*), *FY* (*At5g13480.2*), *FVE* (*At2g19520.1*), and *LD* (*At4g02560.1*) were based on FPKM values. The letters indicate statistically significant differences ( $P < 0.05$ ) based on Duncan method.

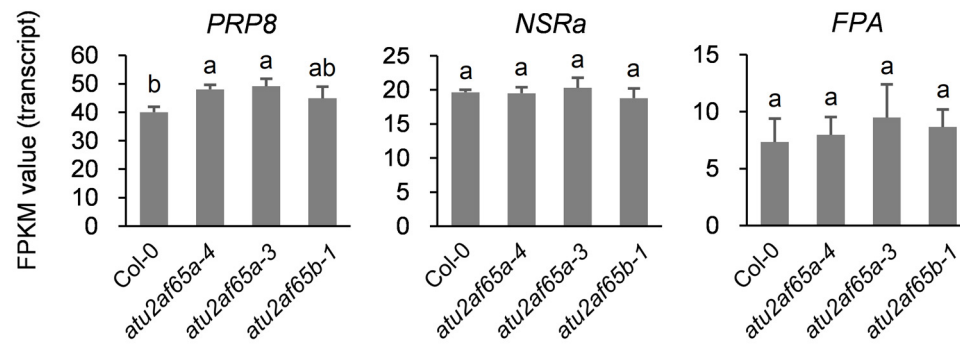

**Figure S9.** Expression patterns of *PRP8* (*At1g80070.1*), *NSRa* (*At1g76940.1*) and *FPA* (*At2g43410.2*) based on FPKM values. The letters indicated statistically significant differences ( $P < 0.05$ ) based on Duncan method.

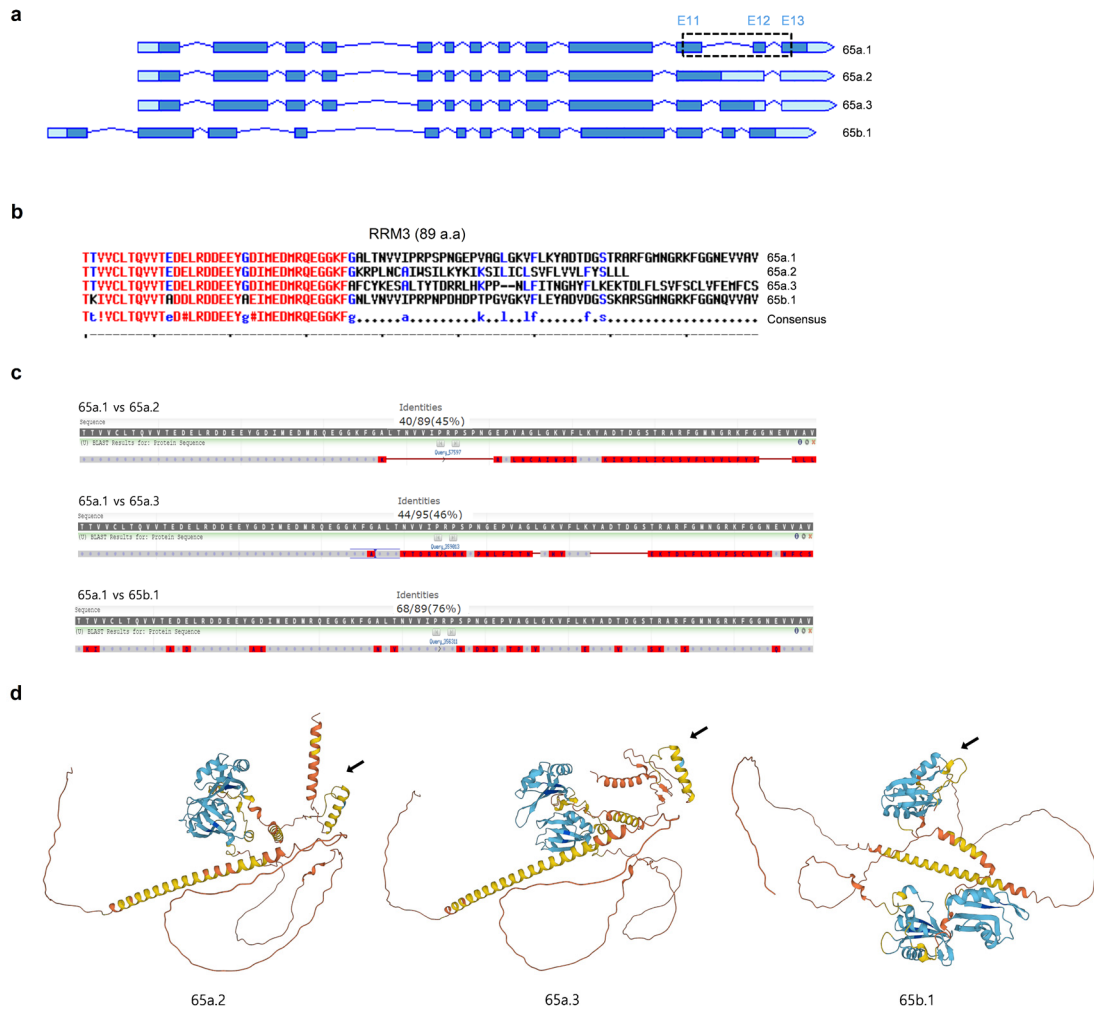

**Figure S10.** Comparison between AtU2AF65a Isoform 1, 2, 3 and AtU2AF65b. **(a)** Gene structure showing the AtU2AF65a Isoform 1 (65a.1), AtU2AF65a Isoform 2 (65a.2), AtU2AF65a Isoform 3 (65a.3) and AtU2AF65b (65b.1) from The Arabidopsis Information Resource (TAIR, <https://www.arabidopsis.org/index.jsp>). The dotted line box indicate 65a.1 RNA recognition motif 3 (RRM3) region. **(b)** Multiple sequence alignment of RRM3 (89 amino acid) from multalin (<http://multalin.toulouse.inra.fr/multalin/>). **(c)** Protein blast of 65a.2, 65a.3, 65b.1 compared to 65a.1 from Needleman-Wunsch Global Align Protein Sequences (Global Align, <https://blast.ncbi.nlm.nih.gov/Blast.cgi>). **(d)** Protein 3D structure of 65a.2, 65a.3 and 65b.1 were predicted at AlphaFold Protein Structure Database (<https://alphafold.ebi.ac.uk/>). The black arrows indicate RRM3 region.

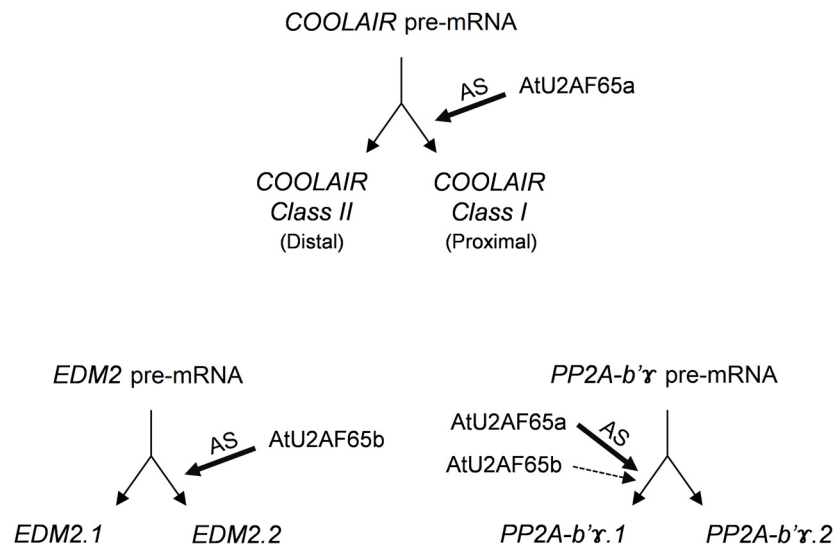

**Figure S11.** Proposed model for the roles of AtU2AF65a and AtU2AF65b in the alternative splicing of *COOLAIR*, *EDM2*, and *PP2A-b'γ* pre-mRNAs. AS, alternative splicing.

**Table S1.** Summary of reads per each sample and replicate

| No    | Type                  | WT                    | <i>atu2af65a-4</i>    | <i>atu2af65a-3</i>    | <i>atu2af65b-1</i>    |
|-------|-----------------------|-----------------------|-----------------------|-----------------------|-----------------------|
| Rep_1 | Raw data reads        | 47,065,642            | 45,464,656            | 58,596,272            | 55,537,190            |
|       | Clean reads           | 44,466,774<br>(94.5%) | 42,770,976<br>(94.1%) | 54,792,960<br>(93.5%) | 52,456,824<br>(94.5%) |
|       | Mapped reads          | 43,092,549<br>(96.9%) | 41,260,114<br>(96.5%) | 53,209,151<br>(97.1%) | 50,880,716<br>(97.0%) |
|       | Uniquely mapped reads | 41,622,369<br>(93.6%) | 41,622,369<br>(93.6%) | 51,867,471<br>(94.7%) | 49,638,813<br>(94.6%) |
|       | Splice                | 17,401,960<br>(39.1%) | 17,089,369<br>(40.0%) | 22,366,781<br>(40.8%) | 21,120,631<br>(40.3%) |
| Rep_2 | Raw data reads        | 41,105,988            | 51,275,834            | 44,808,102            | 48,428,988            |
|       | Clean reads           | 37,917,968<br>(92.2%) | 48,255,618<br>(94.1%) | 42,624,958<br>(95.1%) | 45,612,050<br>(94.2%) |
|       | Mapped reads          | 36,662,742<br>(96.7%) | 46,799,204<br>(97.0%) | 41,348,484<br>(97.0%) | 44,216,016<br>(96.9%) |
|       | Uniquely mapped reads | 35,599,947<br>(93.9%) | 45,456,224<br>(94.2%) | 39,921,227<br>(93.7%) | 42,845,594<br>(93.9%) |
|       | Splice                | 15,312,389<br>(40.4%) | 19,447,605<br>(40.3%) | 17,376,562<br>(40.8%) | 18,740,092<br>(41.1%) |
| Rep_3 | Raw data reads        | 42,919,582            | 44,926,442            | 45,003,956            | 47,139,608            |
|       | Clean reads           | 40,309,730<br>(93.9%) | 42,794,944<br>(95.3%) | 42,449,996<br>(94.3%) | 45,000,960<br>(95.5%) |
|       | Mapped reads          | 38,967,698<br>(96.7%) | 41,497,190<br>(97.0%) | 41,161,367<br>(97.0%) | 43,633,622<br>(97.0%) |
|       | Uniquely mapped reads | 37,283,545<br>(92.5%) | 40,162,798<br>(93.8%) | 39,591,742<br>(93.3%) | 41,827,606<br>(92.9%) |
|       | Splice                | 15,638,533<br>(38.8%) | 17,435,386<br>(40.7%) | 17,194,658<br>(40.5%) | 17,927,630<br>(39.8%) |

**Table S2.** List of misregulated floral activator genes in *atu2af65a* and *atu2af65b* mutants

| DEG          | Gene      | Symbol        | Log <sub>2</sub> fc                                                                     |                                                                                         | Conditions for effect       | Appears in                                                                                                                                                              |
|--------------|-----------|---------------|-----------------------------------------------------------------------------------------|-----------------------------------------------------------------------------------------|-----------------------------|-------------------------------------------------------------------------------------------------------------------------------------------------------------------------|
|              |           |               | 65a                                                                                     | 65b                                                                                     |                             |                                                                                                                                                                         |
| up 65a       | AT1G04870 | PRMT10        | 0.37                                                                                    |        | SD and LD                   | General processes & autonomous pathway                                                                                                                                  |
|              | AT3G04610 | FLK           | 0.32                                                                                    |        | SD and LD                   | General processes & autonomous pathway                                                                                                                                  |
|              | AT3G59060 | PIF5, PIL6    | 0.55                                                                                    |        | MD (12h light/<br>12h dark) | Temperature pathway                                                                                                                                                     |
|              | AT4G31120 | SKB1, PRMT5   | 0.42                                                                                    |        | SD and LD                   | General processes & autonomous pathway                                                                                                                                  |
|              | AT5G40490 | HLP1          | 0.46                                                                                    |        | SD and LD                   | Vernalization, General processes & autonomous pathway                                                                                                                   |
| up 65a&65b   | -         | -             |                                                                                         |                                                                                         | -                           | -                                                                                                                                                                       |
| up 65b       | -         | -             |                                                                                         |                                                                                         | -                           | -                                                                                                                                                                       |
| down 65a     | AT1G26260 | CIB5          |  -0.57 |                                                                                         | LD [no data under SD]       | Temperature pathway, FLC regulation through protein complexes, General processes & autonomous pathway                                                                   |
|              | AT1G51140 | FBH3, BHLH122 |  -0.33 |                                                                                         | SD and LD                   | Photoperiod pathway, Time-course regulation of photoperiodic pathway                                                                                                    |
|              | AT2G45660 | SOC1          |  -0.43 |                                                                                         | SD and LD                   | Temperature pathway, Hormone pathway, Aging pathway, Photoperiod pathway, Sugar pathway, Mains targets of ABC(E)genes, Specification of flower meristems, Vernalization |
|              | AT4G24540 | AGL24         |  -0.83 |                                                                                         | SD and LD                   | General processes & autonomous pathway                                                                                                                                  |
|              | AT5G15840 | CO            |  -0.67 |                                                                                         | LD only                     | Circadian clock, Photoperiod pathway, Time-course regulation of photoperiodic pathway                                                                                   |
|              | AT5G47640 | NF-YB2, HAP3B |  -0.55 |                                                                                         | LD only                     | Hormone pathway, Photoperiod pathway, Time-course regulation of photoperiodic pathway                                                                                   |
| down 65a&65b | AT1G68050 | FKF1, ADO3    |  -0.75 |  -0.76 | SD only                     | Circadian clock overview, Photoperiod pathway, Time-course regulation of photoperiodic pathway                                                                          |
| down 65b     | -         | -             |                                                                                         |                                                                                         | -                           | -                                                                                                                                                                       |
| reverse      | -         | -             |                                                                                         |                                                                                         | -                           | -                                                                                                                                                                       |
|              |           |               |  -0.9  |  0.9   |                             |                                                                                                                                                                         |

**Table S3.** List of misregulated floral repressor genes in *atu2af65a* and *atu2af65b* mutants

| DEG          | Gene      | Symbol      | Log <sub>2</sub> fc |       | Conditions for effect | Appears in                                                                                                                                             |
|--------------|-----------|-------------|---------------------|-------|-----------------------|--------------------------------------------------------------------------------------------------------------------------------------------------------|
|              |           |             | 65a                 | 65b   |                       |                                                                                                                                                        |
| up 65a       | AT2G38810 | HTA8        | 0.36                |       | SD and LD             | General processes & autonomous pathway                                                                                                                 |
|              | AT4G36920 | AP2         | 0.35                |       | SD and LD             | Aging pathway, Photoperiod pathway, Time-course regulation of photoperiodic pathway, Mains targets of ABC(E)genes, Kinetics of ABC(E) genes expression |
| up 65a&65b   | AT2G27550 | ATC         | 1.43                | 1.11  | SD and LD             | Photoperiod pathway                                                                                                                                    |
|              | AT5G39550 | VIM3, ORTH1 | 0.47                | 0.46  | LD [no data under SD] | General processes & autonomous pathway                                                                                                                 |
|              | AT5G65070 | MAF4, AGL69 | 1.04                | 1.72  | SD and LD             | FLC regulation during a cold period                                                                                                                    |
|              | AT5G65080 | MAF5, AGL68 | 4.07                | 4.41  | SD only               | FLC regulation during a cold period                                                                                                                    |
|              | AT1G01060 | LHY         |                     | 0.59  | SD only               | Circadian clock                                                                                                                                        |
| down 65a     | AT2G22540 | SVP         | -0.41               |       | SD and LD             | Temperature pathway, Aging pathway, Photoperiod pathway, Mains targets of ABC(E)genes, Specification of flower meristems, Vernalization                |
|              | AT2G25930 | ELF3        | -0.40               |       | SD and LD             | General processes & autonomous pathway                                                                                                                 |
|              | AT3G04030 | MYR2        | -0.86               |       | SD and LD             | Photoperiod pathway                                                                                                                                    |
|              | AT3G15354 | SPA3        | -0.39               |       | SD only               | Photoperiod pathway                                                                                                                                    |
|              | AT5G18240 | MYR1        | -0.71               |       | SD and LD             | Photoperiod pathway                                                                                                                                    |
|              | AT5G37260 | RVE2, CIR1  | -0.39               |       | LD [no data under SD] | none                                                                                                                                                   |
|              | AT2G40080 | ELF4        | -0.56               | -0.84 | SD and LD             | Temperature pathway, Circadian clock overview, Photoperiod pathway                                                                                     |
| down 65a&65b | AT3G20810 | JMJ30       | -0.64               | -0.51 | SD and LD             | Temperature pathway, Time-course regulation of photoperiodic pathway, General processes & autonomous pathway                                           |
|              | AT1G68840 | TEM2        |                     | -0.47 | LD [no data under SD] | Temperature pathway, Hormone pathway, Photoperiod pathway                                                                                              |
| down 65b     | AT3G54990 | SMZ         |                     | -0.50 | SD and LD             | Temperature pathway, Hormone pathway, Aging pathway, Photoperiod pathway, Time-course regulation of photoperiodic pathway, Vernalization               |
|              | AT5G65050 | MAF2, AGL31 |                     | -0.38 | SD and LD             | Temperature pathway, FLC regulation during a cold period                                                                                               |
|              | AT5G65060 | MAF3, AGL70 |                     | -0.50 | SD and LD             | FLC regulation during a cold period                                                                                                                    |
|              | AT5G10140 | FLC         | 1.04                | -1.16 | SD and LD             | Photoperiod pathway, Vernalization, FLC regulation during a cold period                                                                                |
| reverse      |           |             | -4.5                | 4.5   |                       |                                                                                                                                                        |

**Table S4.** List of the genes from comparison between transcript DEGs and rMAT in *atu2af65a* and *atu2af65b* mutants

| Overlap between<br>65a transcript DEGs vs 65a rMAT |             |         |          | Overlap between<br>65b transcript DEGs vs 65b rMAT                          |             |           |              |
|----------------------------------------------------|-------------|---------|----------|-----------------------------------------------------------------------------|-------------|-----------|--------------|
| No                                                 | Gene Access | Gene    | AS type  | No                                                                          | Gene Access | Gene      | AS type      |
| 1                                                  | AT1G02850   | BGLU11  | A3SS, RI | 1                                                                           | AT1G10657   | -         | A3SS         |
| 2                                                  | AT1G03457   | -       | A3SS     | 2                                                                           | AT1G22750   | -         | A3SS         |
| 3                                                  | AT1G06960   | -       | A3SS     | 3                                                                           | AT1G28395   | -         | SE, A3SS     |
| 4                                                  | AT1G09140*  | SR30    | A3SS, RI | 4                                                                           | AT1G51200   | SAP2      | SE           |
| 5                                                  | AT1G12250   | -       | SE, A5SS | 5                                                                           | AT1G73650   | -         | A3SS, RI     |
| 6                                                  | AT1G13860   | QUL1    | A3SS     | 6                                                                           | AT2G29630   | PY        | RI           |
| 7                                                  | AT1G23020   | FRO3    | A3SS     | 7                                                                           | AT2G36670   | -         | SE           |
| 8                                                  | AT1G28330   | DYL1    | SE       | 8                                                                           | AT3G61010   | -         | RI           |
| 9                                                  | AT1G28395   | -       | A3SS, RI | 9                                                                           | AT4G00560*  | -         | SE, A3SS     |
| 10                                                 | AT1G65270   | -       | A3SS     | 10                                                                          | AT4G02260   | RSH1      | SE           |
| 11                                                 | AT1G73470*  | -       | RI       | 11                                                                          | AT4G30200   | VIL2      | A3SS         |
| 12                                                 | AT1G73650   | -       | RI       | 12                                                                          | AT4G36690*  | AtU2AF65a | A3SS, RI     |
| 13                                                 | AT2G28290   | SYD     | A3SS     | 13                                                                          | AT5G25520   | -         | SE, A3SS, RI |
| 14                                                 | AT2G30170   | -       | RI       | 14                                                                          | AT5G37850*  | SOS4      | A5SS         |
| 15                                                 | AT2G36670   | -       | SE       | 15                                                                          | AT5G60170   | -         | A3SS         |
| 16                                                 | AT2G41720   | EMB2654 | RI       | * The splicing patterns of these genes were further analyzed in this study. |             |           |              |
| 17                                                 | AT2G44920   | -       | RI       |                                                                             |             |           |              |
| 18                                                 | AT3G16230   | -       | SE       |                                                                             |             |           |              |
| 19                                                 | AT3G48050   | -       | RI       |                                                                             |             |           |              |
| 20                                                 | AT3G61010   | -       | RI       |                                                                             |             |           |              |
| 21                                                 | AT4G02260   | RSH1    | SE       |                                                                             |             |           |              |
| 22                                                 | AT4G02640   | BZO2H1  | A3SS     |                                                                             |             |           |              |
| 23                                                 | AT4G12560   | CPR30   | A5SS     |                                                                             |             |           |              |
| 24                                                 | AT4G16990   | RLM3    | SE       |                                                                             |             |           |              |
| 25                                                 | AT4G19550   | -       | SE       |                                                                             |             |           |              |
| 26                                                 | AT4G22540   | ORP2A   | A3SS     |                                                                             |             |           |              |
| 27                                                 | AT4G26650   | -       | SE       |                                                                             |             |           |              |
| 28                                                 | AT4G32850   | nPAP    | A3SS, RI |                                                                             |             |           |              |
| 29                                                 | AT5G04430   | BTR1    | A3SS     |                                                                             |             |           |              |
| 30                                                 | AT5G13800   | PPH     | SE       |                                                                             |             |           |              |
| 31                                                 | AT5G19030   | -       | A3SS     |                                                                             |             |           |              |
| 32                                                 | AT5G22620   | -       | SE       |                                                                             |             |           |              |
| 33                                                 | AT5G36170   | HCF109  | A3SS     |                                                                             |             |           |              |
| 34                                                 | AT5G48150   | PAT1    | A3SS     |                                                                             |             |           |              |
| 35                                                 | AT5G50330   | -       | SE       |                                                                             |             |           |              |
| 36                                                 | AT5G53050   | -       | A5SS     |                                                                             |             |           |              |
| 37                                                 | AT5G61310   | -       | A3SS     |                                                                             |             |           |              |



**Table S5.** Oligonucleotides used in this study

| Direction      | No | Gene      | Primers (5' to 3')             |
|----------------|----|-----------|--------------------------------|
| Forward<br>(F) | 1  | FLC       | AACAGCATGCTGATGATCTTAAAG       |
|                | 2  | SOC1      | GGATCGAGTCAGCACCAAACC          |
|                | 3  | AGL24     | TTCTCTCTCACTCACACATTAGG        |
|                | 4  | SOC1      | AGCCAATCGGGAAATTAATAAAGA       |
|                | 5  | SOC1      | TTTATGTGTGTGACTAATCTTGTATTG    |
|                | 6  | AGL24     | TCCAGCTCAAGAATGAGAGACAT        |
|                | 7  | AGL24     | TTTATAAGAAAGATGGATTGTTTGTGAAA  |
|                | 8  | COOLAIR   | CTCGATGCAATTCTCACACG           |
|                | 9  | FLC       | CTTAAAGCCTTGGATCATCAGTCA       |
|                | 10 | IPP2      | GTATGAGTTGCTTCTCCAGCAAAG       |
|                | 11 | EDM2      | TTCCAGCCTGAGATTCTGTCT          |
|                | 12 | PP2A-b'γ  | CCATTGGCTGTGTTCAATGATTA        |
|                | 13 | EDM2      | GTCATAGTATAATCTCCATCAACACA     |
|                | 14 | PP2A-b'γ  | TTGATTTCATTTCATCTCCAGTGCC      |
|                | 15 | SR30      | AAGCTGTAGCTATAGTAGCAAGAGCAGGAG |
|                | 16 | NA        | AGTGACTGATTCAGATGACCAAGTGT     |
|                | 17 | NA        | ATCAACGTACCTACTTCTCTGTAAACTGG  |
|                | 18 | SOS4      | GTTAAAAAGTCTCATGGGTCAAACAGAAG  |
|                | 19 | AtU2AF65a | AGGGAACAATGCTACAAAAGCCT        |
|                | 20 | AtU2AF65a | GAAGGCGGAAAGTTGGTGCTT          |
|                | 21 | AtU2AF65a | AAGTTGCCTTTTGCTATAA            |
|                | 22 | PP2AA3    | GCGGTTGTGGAGAACATGATACG        |
|                | 23 | AtU2AF65b | CCGAGCAAGAAGAAGTCTTACT         |
|                | 24 | SVP       | CTGTAGCTCCAGCATGAAGGAA         |
|                | 25 | FLM       | AACTTAGAGCCTTAGATCTTGAAGAAA    |
|                | 26 | FLM       | CCGGTGACGAGATAGAAGCG           |
|                | 27 | FD        | TAATCTTCATACCCACCATCAC         |
|                | 28 | miR167a   | GAAGCTGCCAGCATGATCTA           |
|                | 29 | SOC1      | ACCTATACATACACAAACCCTTTATC     |
|                | 30 | AGL24     | TTCTCTCTCACTCACACATTAGG        |
|                | 31 | AtUBQ10   | CACCATTGACAACGTGAAGG           |
| Reverse<br>(R) | 1  | FLC       | GACATCTCCATCTCAGCTTCTGC        |
|                | 2  | SOC1      | CCCAATGAACAATTGCGTCTC          |
|                | 3  | AGL24     | TGTTATGTTATCAATCTTCTTTATCCTTA  |
|                | 4  | SOC1      | CTTTAGGAGAGAAGATGATAAGAGA      |
|                | 5  | SOC1      | CATTCTCTATTCTCTTCATCTGAGTT     |
|                | 6  | AGL24     | CCGGAGATGAGTAGAAGGTG           |
|                | 7  | COOLAIR   | TCCTTGGATAGAAGACAAAAAGAGA      |
|                | 8  | COOLAIR   | TATCTTCTGTTTTGTGCTCTTTACTTT    |
|                | 9  | COOLAIR   | TTCTCCTCCGGCGATAAGTA           |
|                | 10 | FLC       | TGAACAAGAGCATCGATACTCACA       |
|                | 11 | IPP2      | GAGGATGGCTGCAACAAGTGT          |
|                | 12 | EDM2      | TAAGAAACTGAATGGAATGCAACGT      |
|                | 13 | PP2A-b'γ  | CTACTTCGCAACAAGCCTAAACTA       |
|                | 14 | EDM2      | CGTTATCAGATCTTCTCGCAA          |
|                | 15 | PP2A-b'γ  | GTTTGGATTGCGATCATTATGCG        |
|                | 16 | SR30      | TGGCCAGTTTTCATTTTCAACCAGATATC  |
|                | 17 | NA        | AAGGATTTTCTCAAGCTCATATAACTCGG  |
|                | 18 | NA        | ACCATTTGAGCCATTTGAACACGAGAT    |
|                | 19 | SOS4      | ATACCCCAACAATTGAAGAGGAAAGACA   |

|    |           |                           |
|----|-----------|---------------------------|
| 20 | AtU2AF65a | AATCACCTGTTCAAACCTGTCTT   |
| 21 | AtU2AF65a | CCATCTGTATCGGCATACTTCAA   |
| 22 | AtU2AF65a | TAAGAAATAGTGGCCATTG       |
| 23 | PP2AA3    | GAACCAAACACAATTCGTTGCTG   |
| 24 | AtU2AF65b | CATACTTGTCTTCGGGGTAATAC   |
| 25 | SVP       | TGAAGTTCGCTGATCTCACTCATA  |
| 26 | FLM       | TCTTTCCCATCTGGCTAGCCA     |
| 27 | FLM       | TCTTCAAGCTTGCTTTGGACTGTTT |
| 28 | FD        | CAATCCCCAAAAGAGAAACAAG    |
| 29 | miR167a   | ACATAAATTCTTCAGATCCACATAC |
| 30 | SOC1      | CATTCTTATTCTTTCATCTGAGTT  |
| 31 | AGL24     | CCGGAGATGAGTAGAAGGTG      |
| 32 | AtUBQ10   | ACGCAGGACCAAGTGAAGAG      |

**Table S6.** Oligonucleotides used in this study

| Usage Data | Combination | Gene Access | Gene Detail      | Purpose     |
|------------|-------------|-------------|------------------|-------------|
| Fig. 2c    | F1 + R1     | AT5G10140   | FLC              | RT-PCR      |
|            | F2 + R2     | AT2G45660   | SOC1             | RT-PCR      |
|            | F3 + R3     | AT4G24540   | AGL24            | RT-PCR      |
| Fig. 2d    | R4          | AT2G45660   | SOC1 specific    | Oligo of RT |
|            | F4 + R5     | AT2G45660   | spliced SOC1     | qPCR        |
|            | F5 + R5     | AT2G45660   | unspliced SOC1   | qPCR        |
|            | R6          | AT4G24540   | AGL24 specific   | Oligo of RT |
|            | F6 + R6     | AT4G24540   | spliced AGL24    | qPCR        |
|            | F7 + R6     | AT4G24540   | unspliced AGL24  | qPCR        |
| Fig. 4b-d  | F8 + R7     | AT5G01675   | COOLAIR Class I  | qPCR        |
|            | F8 + R7     | AT5G01675   | COOLAIR Class I  | RT-PCR      |
|            | F8 + R8     | AT5G01675   | COOLAIR Class II | qPCR        |
|            | F8 + R9     | AT5G01675   | COOLAIR Class II | RT-PCR      |
|            | F9 + R10    | AT5G10140   | FLC              | qPCR        |
|            | F1 + R1     | AT5G10140   | FLC              | RT-PCR      |
|            | F10 + R11   | AT3G02780   | IPP2             | qPCR        |
| Fig. 5a-b  | F11 + R12   | AT5G55390   | EDM2             | qPCR        |
|            | F12 + R13   | AT4G15415   | PP2A-b'γ.1       | qPCR        |
|            | F10 + R11   | AT3G02780   | IPP2             | qPCR        |
| Fig. 5c    | F13 + R14   | AT5G55390   | EDM2             | RT-PCR      |
|            | F14 + R15   | AT4G15415   | PP2A-b'γ         | RT-PCR      |
| Fig. 6d    | F15 + R16   | AT1G09140   | SR30             | RT-PCR      |
|            | F16 + R17   | AT1G73470   | NA               | RT-PCR      |
| Fig. 6e    | F17 + R18   | AT4G00560   | NA               | RT-PCR      |
|            | F18 + R19   | AT5G37850   | SOS4             | RT-PCR      |
|            | F19 + R20   | AT4G36690   | AtU2AF65a        | RT-PCR      |
| Fig. 7a    | F20 + R21   | AT4G36690   | AtU2AF65a.1      | qPCR        |
|            | F21 + R22   | AT4G36690   | AtU2AF65a.3      | qPCR        |
|            | F22 + R23   | AT1G13320   | PP2AA3           | qPCR        |
| Fig. 7b    | F19 + R20   | AT4G36690   | AtU2AF65a        | RT-PCR      |
| Fig. 7c    | F23 + R24   | AT1G60900   | AtU2AF65b        | RT-PCR      |
| Fig. S5b   | F24 + R25   | AT2G22540   | SVP.1            | RT-PCR      |
|            | F25 + R26   | AT1G77080   | FLM-β            | RT-PCR      |
|            | F26 + R27   | AT1G77080   | FLM-δ            | RT-PCR      |
|            | F27 + R28   | AT4G35900   | FD               | RT-PCR      |
| Fig. S6b   | F1 + R10    | AT5G10140   | FLC              | RT-PCR      |
|            | F28 + R29   | AT3G22886   | miR167a          | RT-PCR      |
| Fig. S7    | R4          | AT2G45660   | SOC1 specific    | Oligo of RT |
|            | F29 + R30   | AT2G45660   | SOC1             | RT-PCR      |
|            | R6          | AT4G24540   | AGL24 specific   | Oligo of RT |
|            | F30 + R31   | AT4G24540   | AGL24            | RT-PCR      |
|            | F31 + R32   | AT4G05320   | AtUBQ10          | RT-PCR      |
